# Supplementary material
Source: PubMed Central journal article supplement (PMC5895851)
Supplement: NIHMS955662-supplement-Figures.pdf [file NIHMS955662-supplement-Figures.pdf]

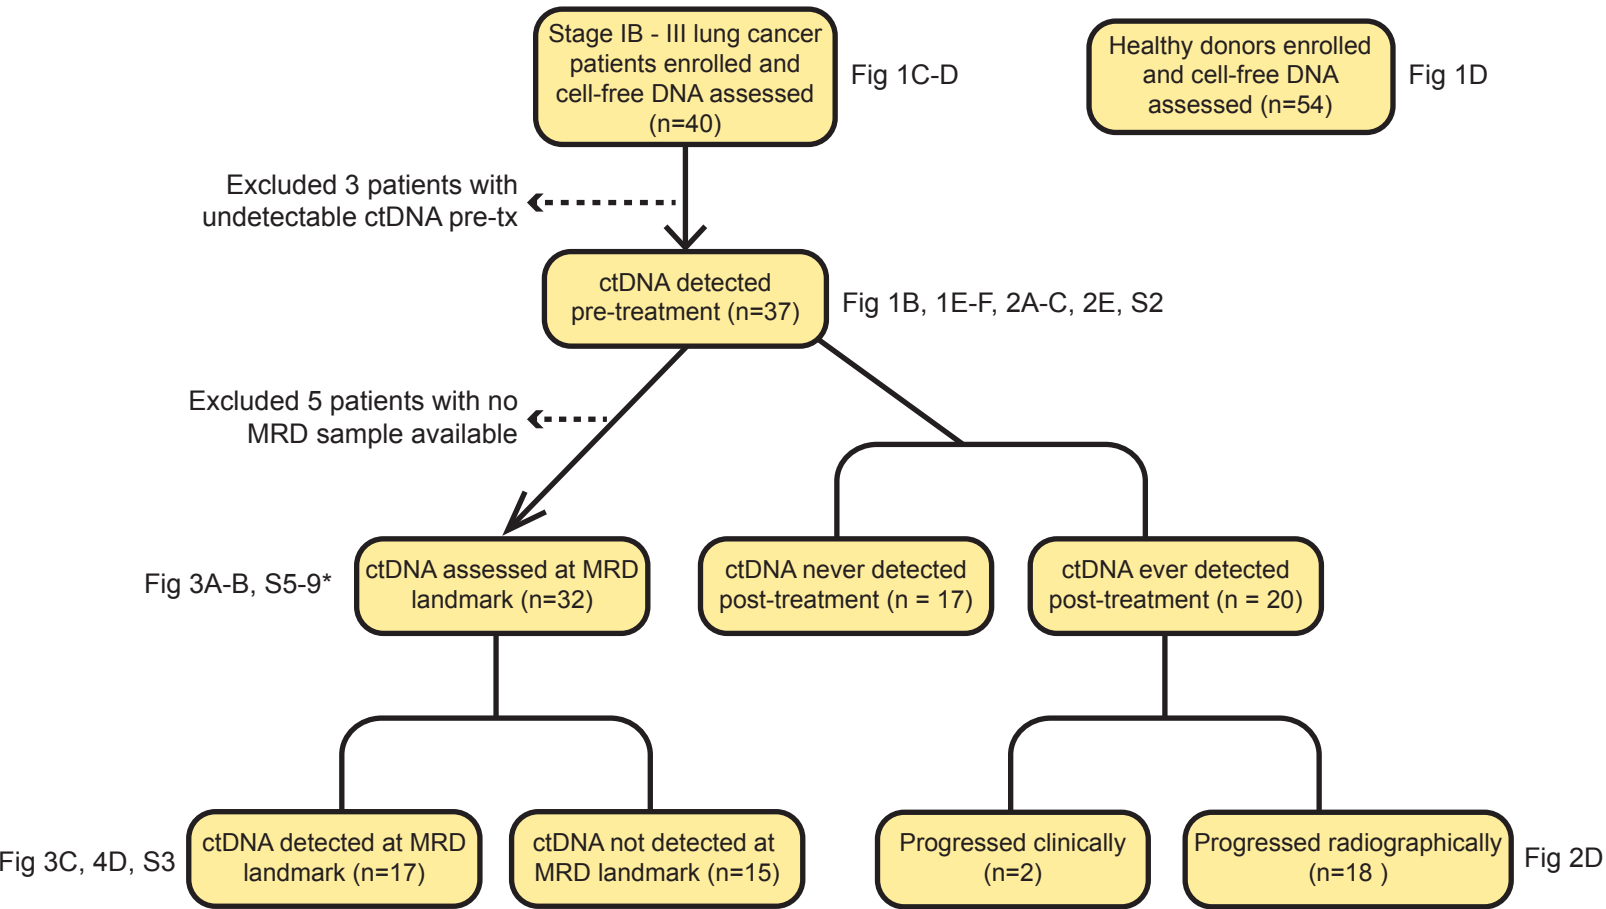

\*For Fig S6, excluded 1 patient because CT scan was not performed at MRD landmark. For Fig S8, assessed 29 NSCLC patients. For Fig S9, analyzed 13 patients that were assessed at early MRD landmark ( $\leq 6$  weeks post-treatment).

**Supplemental Figure S1. Flow diagram.** Number of patients analyzed per figure and table.

- ctDNA never detected post-tx ( $n = 17$ )
- ctDNA ever detected post-tx ( $n = 20$ )

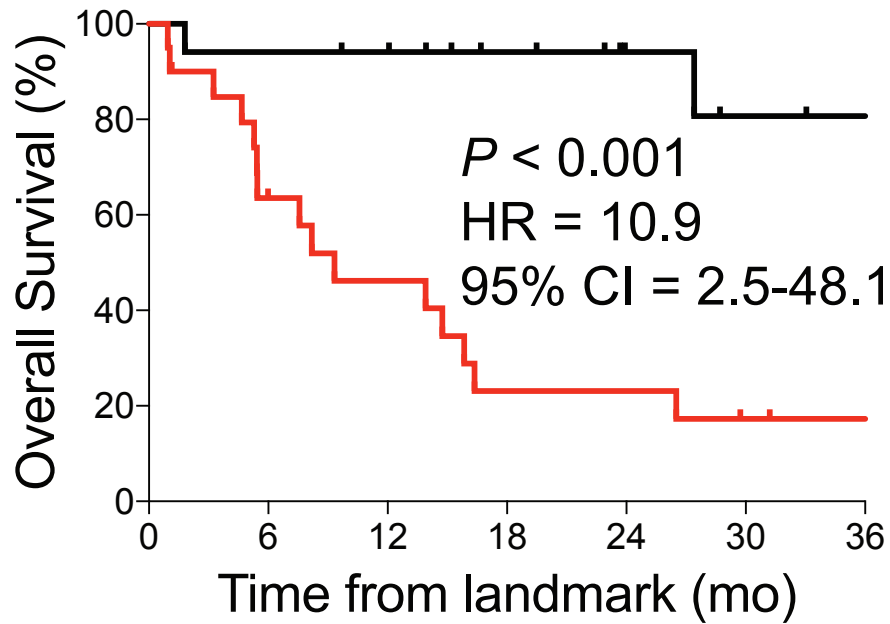

**Supplemental Figure S2. Overall survival analysis based on ctDNA detection during post-treatment surveillance.** Kaplan-Meier analysis stratified by ctDNA detection during post-treatment surveillance (ever detected vs. never detected). Landmark is first post-treatment blood draw.  $P$ -value was calculated by log-rank test and HR by Cox  $exp(beta)$  method.

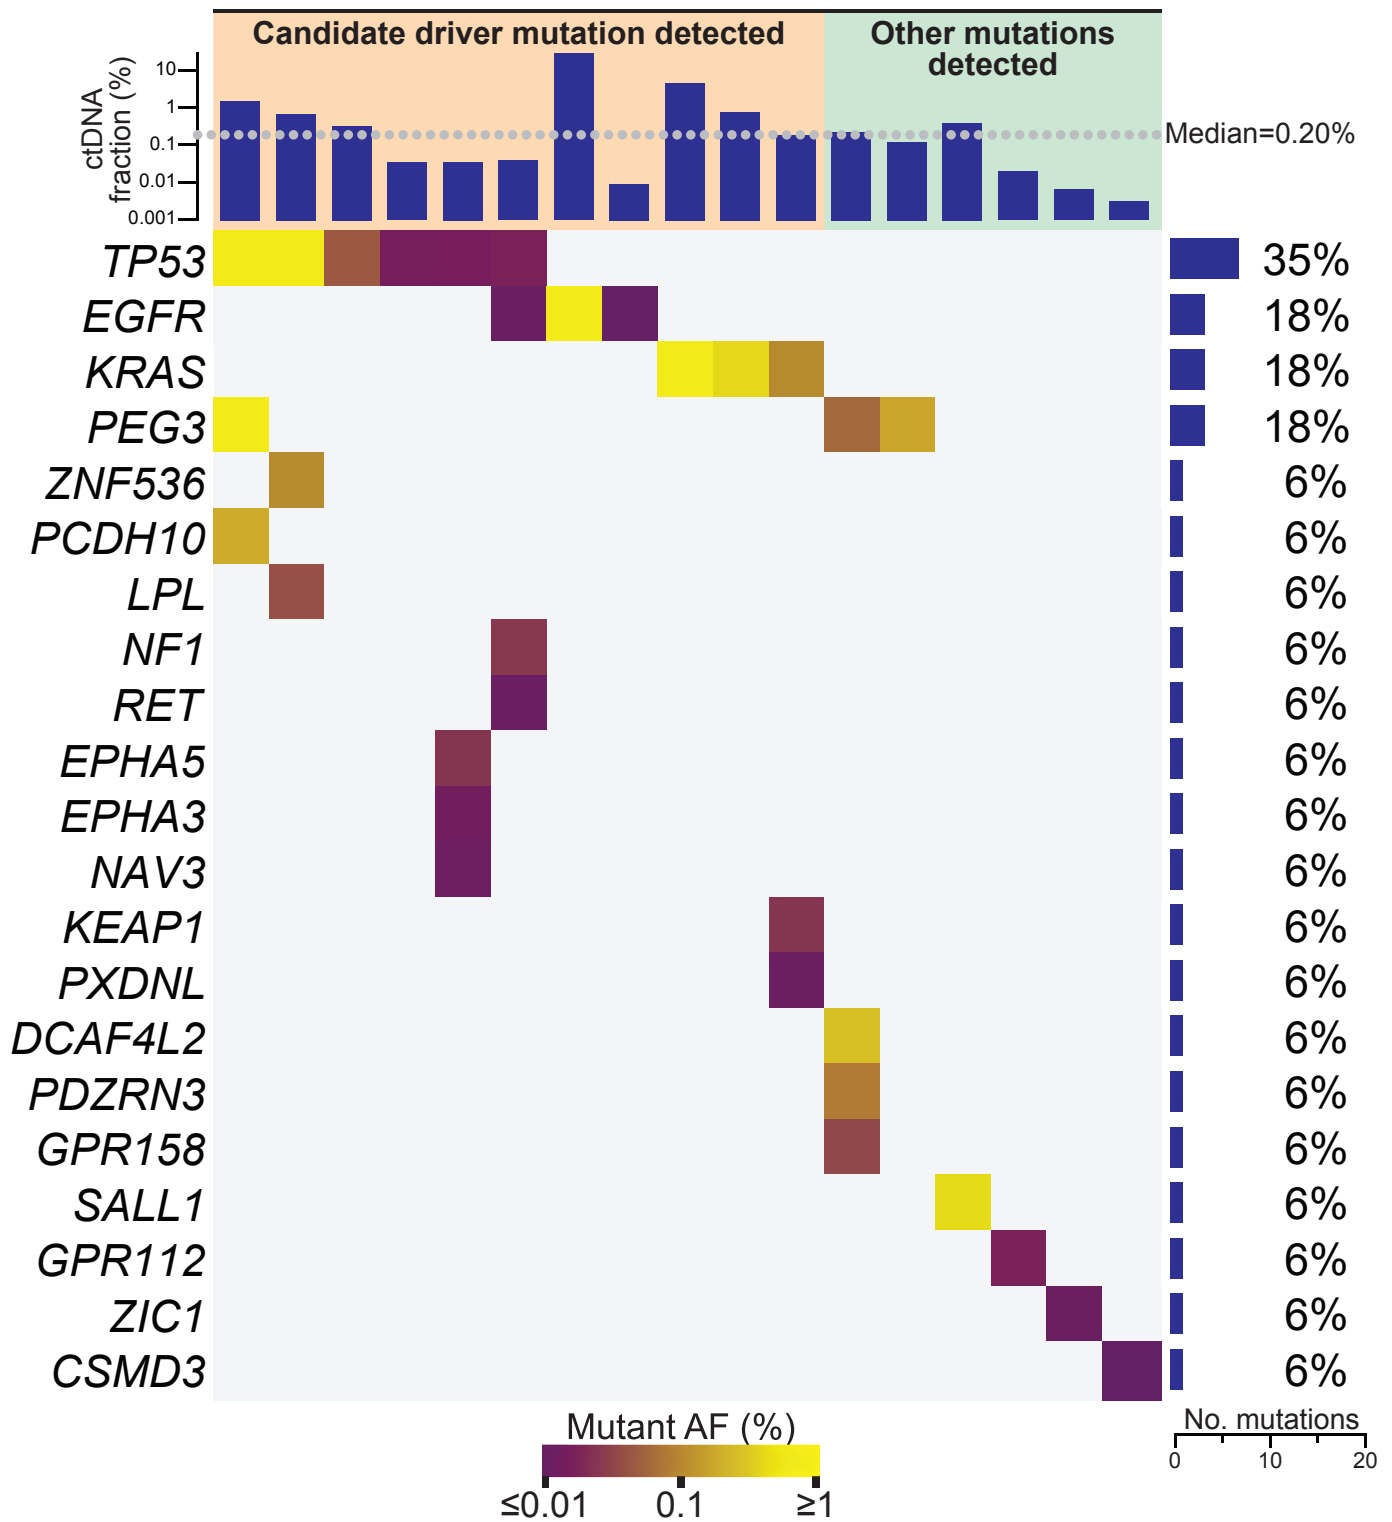

**Supplemental Figure S3. Heat map depicting mutations detected in plasma at MRD landmark.** Columns represent data from the first post-treatment blood sample from each patient with detectable ctDNA MRD ( $n = 17$ ). Global mutant allele fraction is indicated by the upper bar graph. Cases in which candidate driver ( $n = 11$ ) or only other (likely passenger) mutations ( $n = 6$ ) were detected are shown. Heat map indicates allele fractions of individual mutations. Mutation recurrence rates are depicted by bar graph to the right.

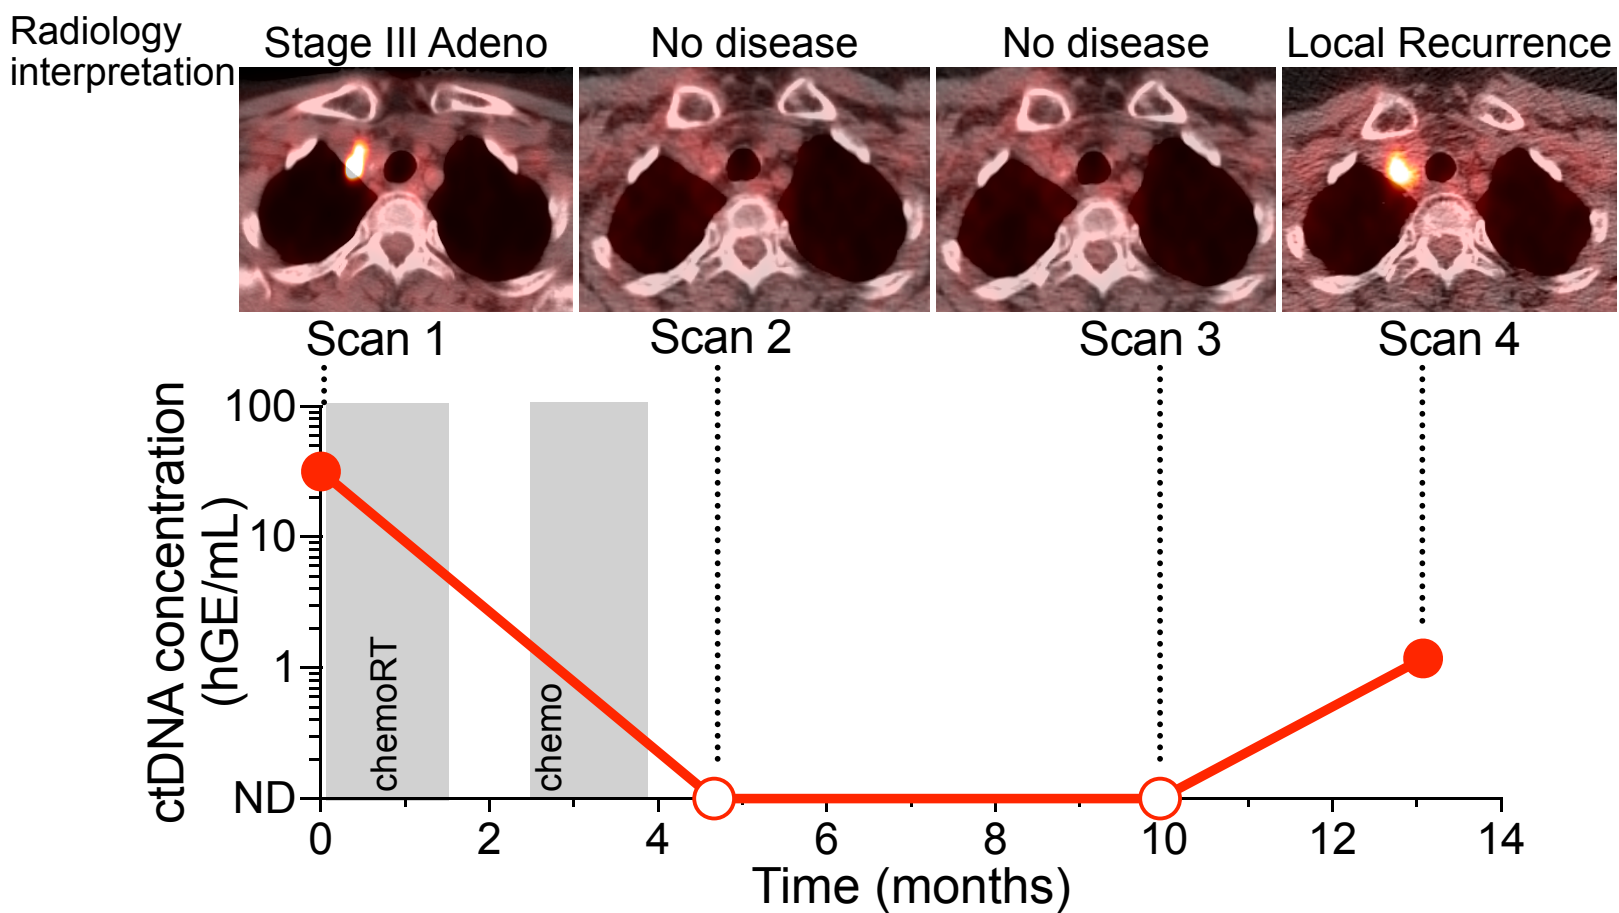

**Supplemental Figure S4. Detection of ctDNA at time of local recurrence in a patient with Stage III NSCLC.** For patient LUP26, post-treatment ctDNA was not detected (ND) at the MRD landmark but was detected at time of local recurrence.

- No ctDNA detected at MRD landmark ( $n = 15$ )
- ctDNA detected at MRD landmark ( $n = 17$ )

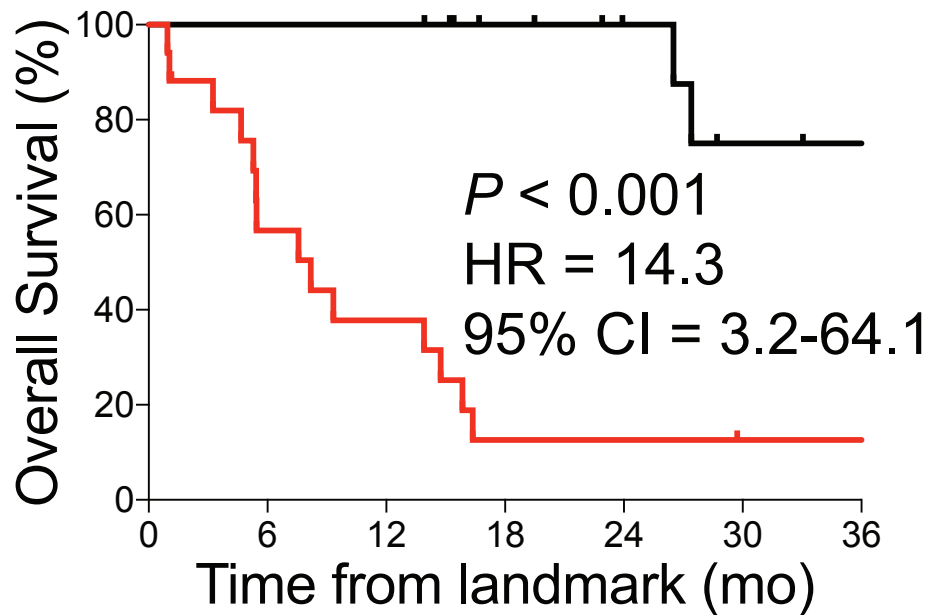

**Supplemental Figure S5. Overall survival based on ctDNA detection at the MRD landmark.** Kaplan-Meier analysis stratified by ctDNA detection at the MRD landmark. The MRD landmark was pre-specified to be  $\leq 4$  months after treatment completion.  $P$ -value calculated by log-rank test and HR by Cox  $exp(beta)$  method.

### CT imaging interpretation (RECIST) at MRD landmark\*

- Complete or partial response ( $n = 13$ )
- Stable or progressive disease ( $n = 15$ )

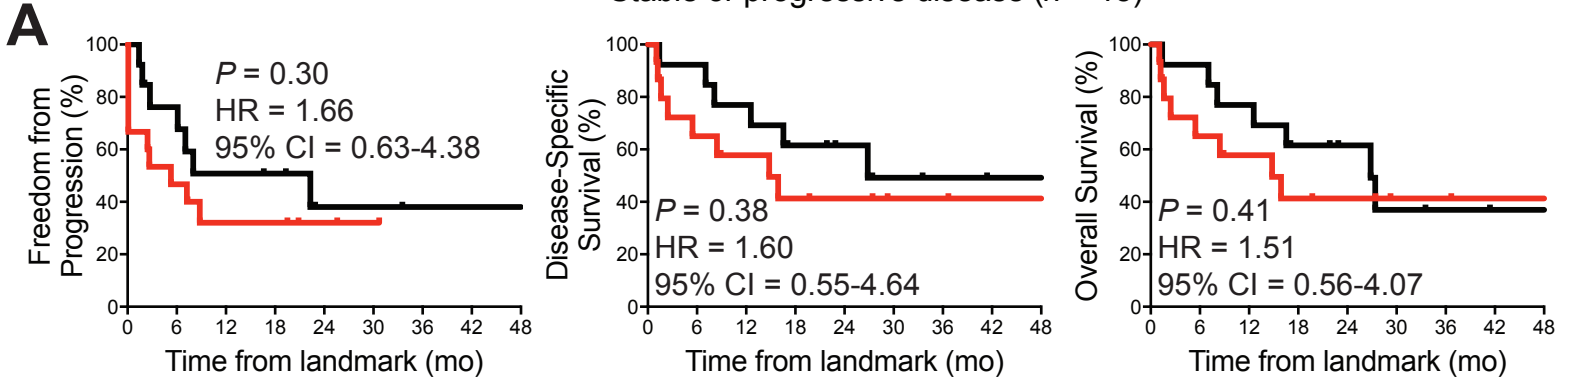

\*3 patients not evaluable due to extensive pneumonitis or fibrosis

### **B** CT interpretation (RECIST) at MRD landmark

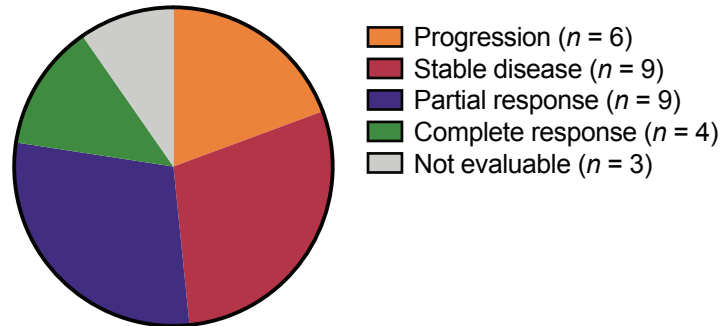

**Supplemental Figure S6. CT imaging assessment at the MRD landmark. (A)** Kaplan-Meier analysis stratified by CT scan RECIST interpretation at the MRD landmark (first post-treatment time-point within 4 months of treatment completion). **(B)** CT interpretation by RECIST criteria at the MRD landmark. One patient excluded from analysis because no CT scan performed within 4 months of treatment completion.

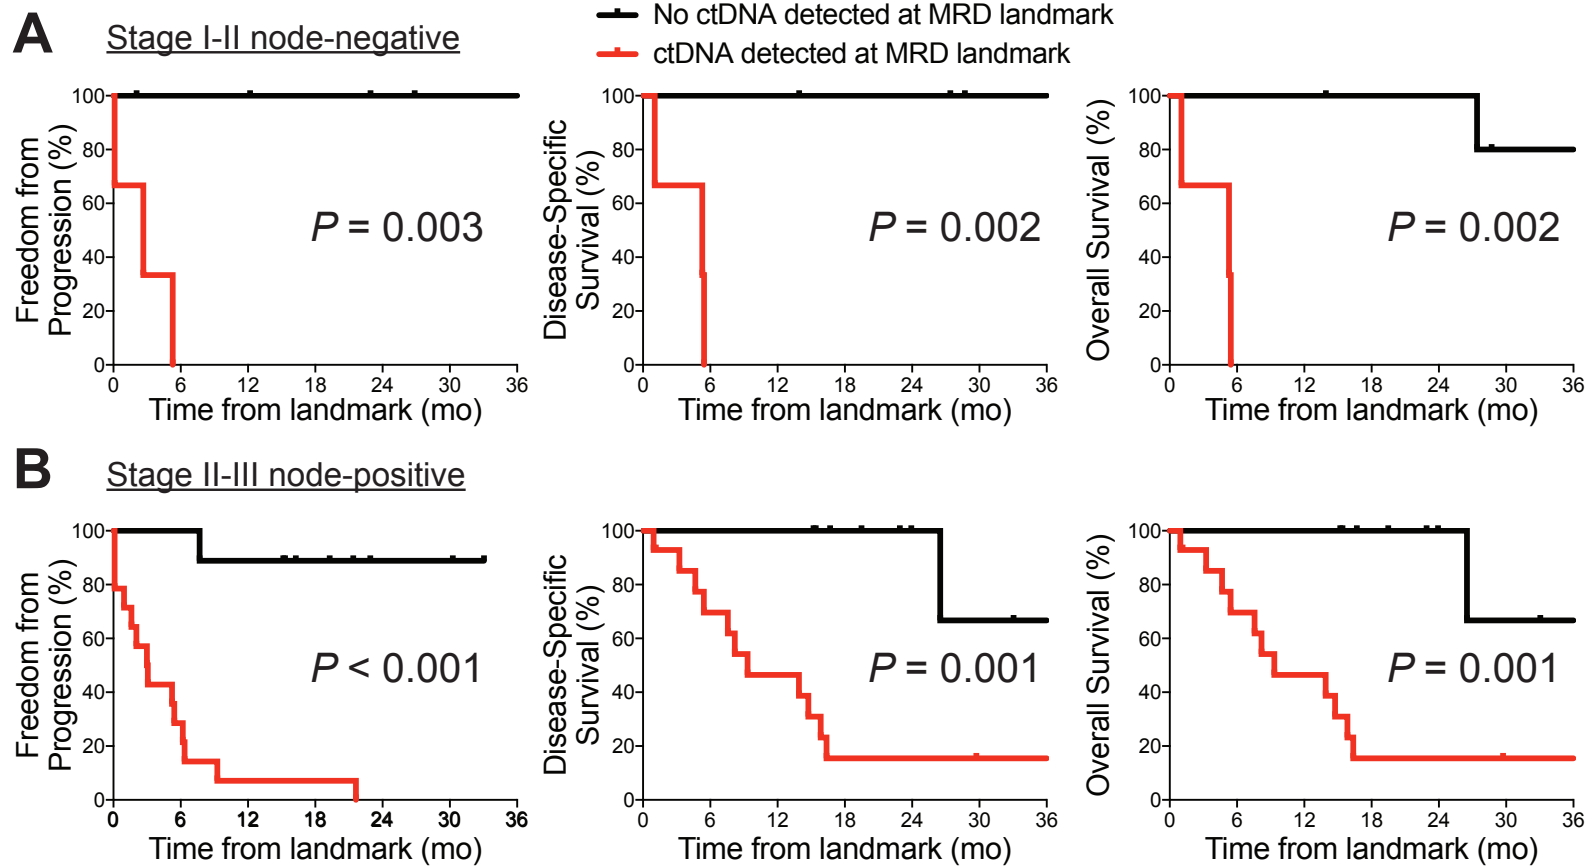

**Supplemental Figure S7. ctDNA MRD is prognostic for node-negative and node-positive lung cancer patients.** Freedom from progression, disease-specific survival and overall survival from MRD landmark in **(A)** stage I-II node-negative patients ( $n = 9$ ), **(B)** stage II-III node-positive patients ( $n = 23$ ). HR > 10 for all analyses.

## NSCLC patients analyzed at the MRD landmark

- No ctDNA detected at MRD landmark ( $n = 14$ )
- ctDNA detected at MRD landmark ( $n = 15$ )

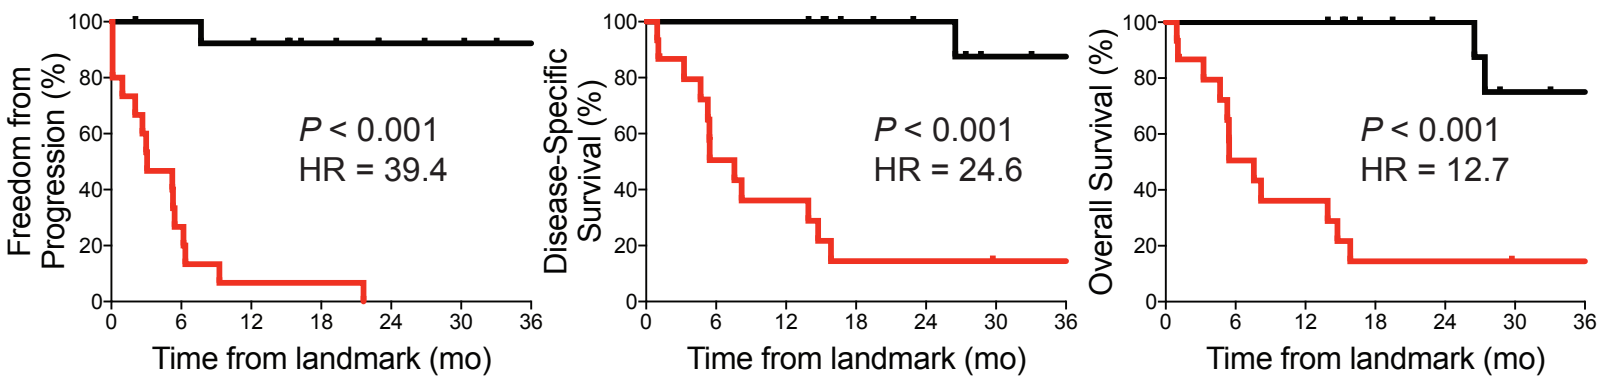

**Supplemental Figure S8. ctDNA MRD is prognostic for localized NSCLC patients.** Kaplan-Meier analysis of NSCLC patients stratified by ctDNA detection at the MRD landmark after definitive intent treatment.  $P$ -value calculated by log-rank test and HR by Cox  $exp(beta)$  method.



— No ctDNA detected at early MRD landmark  
— ctDNA detected at early MRD landmark

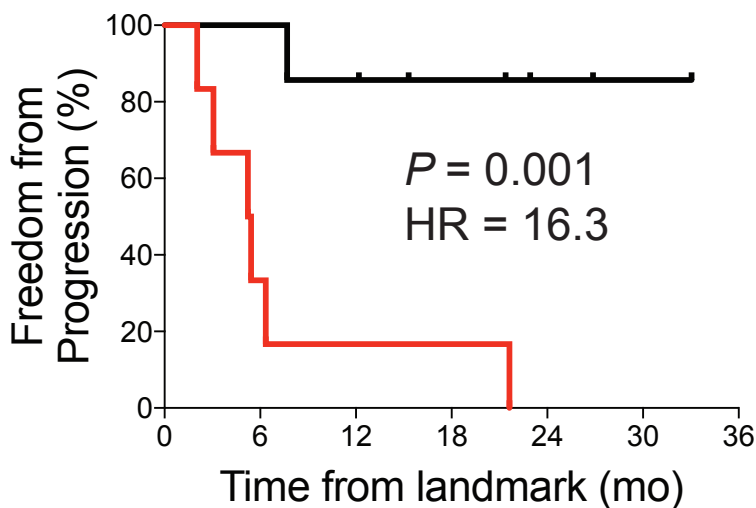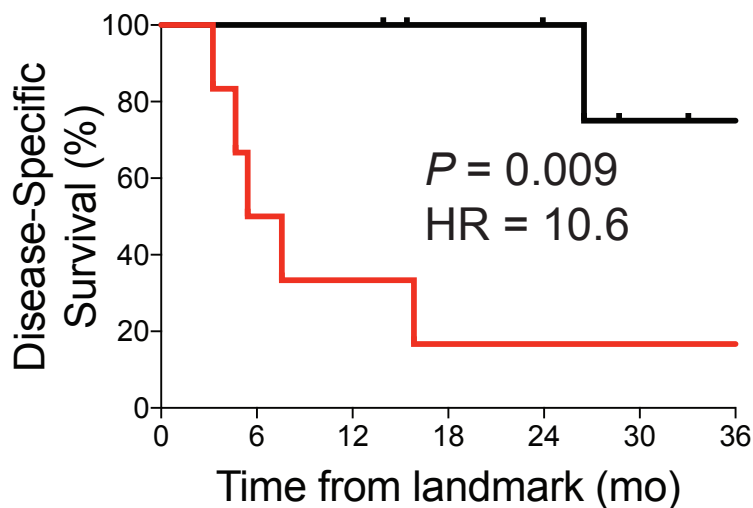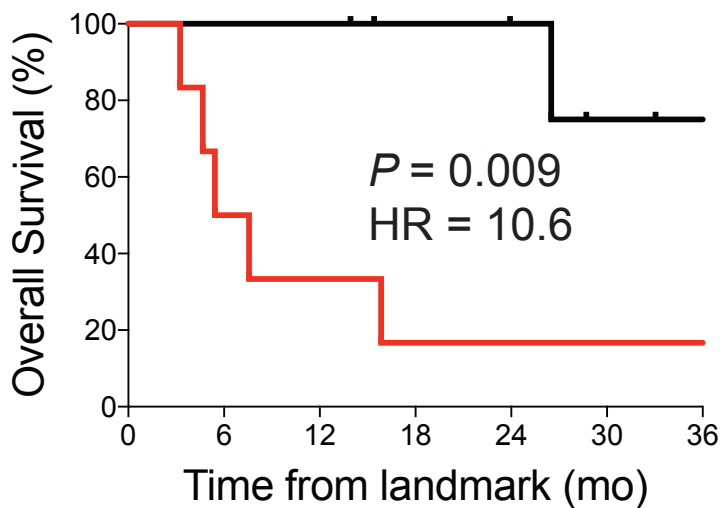

**Supplemental Figure S9. ctDNA detection is prognostic at early MRD landmark.** Kaplan-Meier analysis stratified by ctDNA detection at early MRD landmark ( $\leq 6$  weeks after completion of all treatment;  $n = 13$ ).  $P$ -value calculated by log-rank test and HR by Cox  $\exp(\beta)$  method.

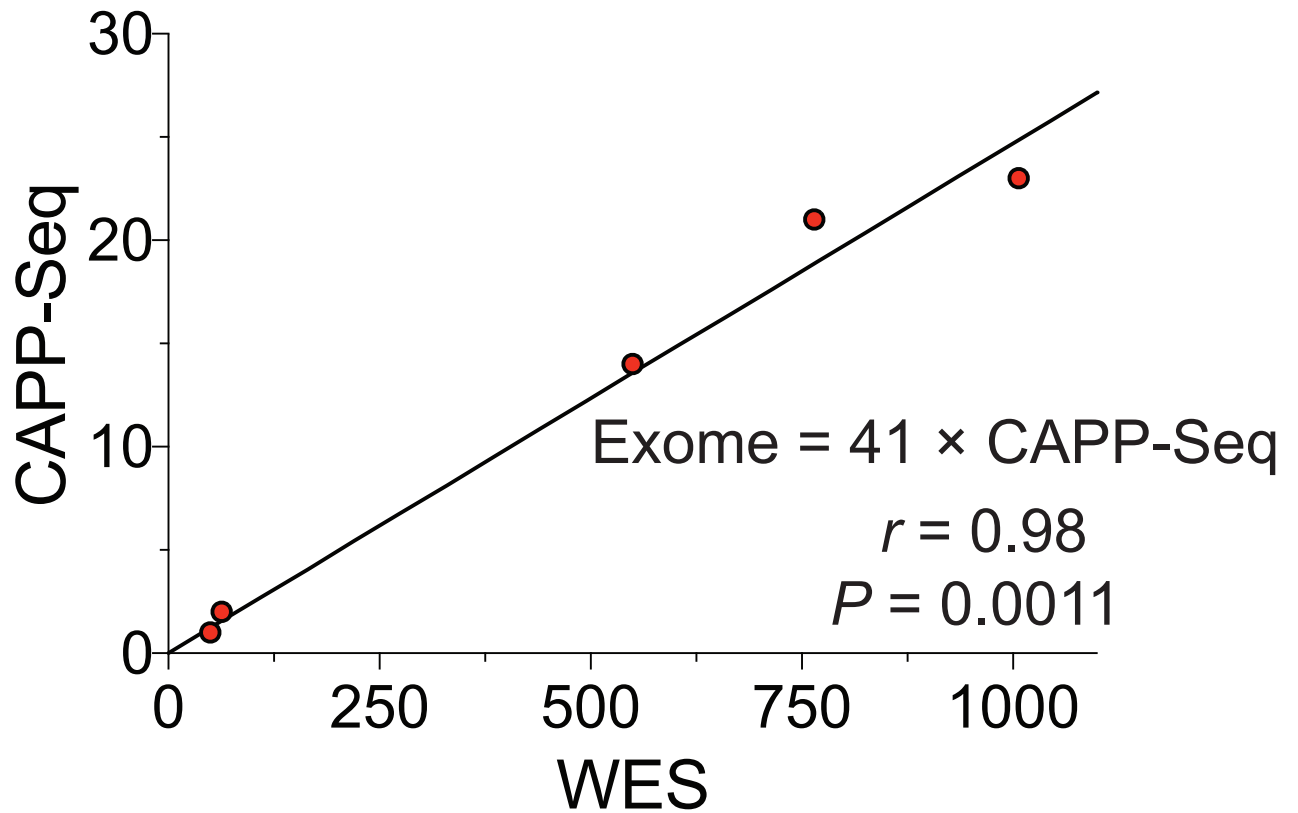

**Supplemental Figure S10. Concordance between the number of non-synonymous mutations found using CAPP-Seq and whole exome sequencing.** Non-synonymous mutation burden was independently measured by CAPP-Seq and whole exome sequencing (WES) using DNA from 5 NSCLC tumors.
